# Supplementary material for: CD8+ T cell evasion mandates CD4+ T cell control of chronic gamma-herpesvirus infection
Source: PubMed Central journal article supplement (PMC5398720; doi:10.1371/journal.ppat.1006311), 2017-04-10

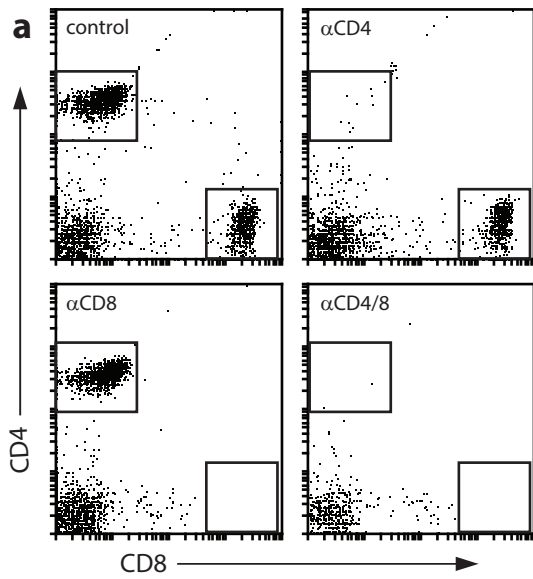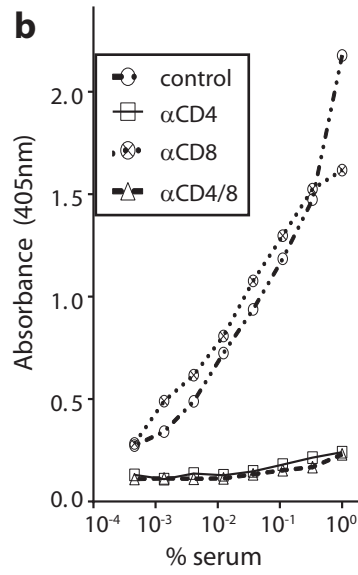

Supplement: ppat.1006311.s004.pdf [file ppat.1006311.s004.pdf]
